# Supplementary material for: Single-phase white light material and antibiotic detection of lanthanide metal–organic frameworks
Source: Royal Society of Chemistry journal article supplement (doi:10.1039/d3dt01830j), 2023-01-01
Supplement: d3dt01830j1.pdf [file d3dt01830j1.pdf]

## Supporting Information

### Single-phase white light material and antibiotic detection of lanthanide metal-organic framework

Shunan Ding,<sup>a §</sup> Qi Zhou,<sup>a §</sup> Guojian Ren,<sup>a\*</sup> Yonghang Yang,<sup>a</sup> Cong Wang,<sup>a</sup> MeiLing Li,<sup>a</sup> Guang Che,<sup>a</sup> Danfeng He<sup>b</sup> and Qinhe Pan<sup>a\*</sup>

<sup>a</sup> Key Laboratory of Advanced Materials of Tropical Island Resources, Ministry of Education, School of Chemistry and Chemical Engineering, Hainan University, Haikou 570228

<sup>b</sup> School of Science, Qiongtai Normal University, Haikou 571127, China.

\*(G.R.) E-mail: rgj860508@163.com.

\*(Q.P.) E-mail: panqinhe@163.com.

## CONTENTS

### Materials and Physical Measurements

#### X-ray Crystal Structure Analysis

**Table S1.** The crystal data of **HNU-82-84**.

**Figure S1.** The IR spectrum of **HNU-82**.

**Figure S2.** The TG plot of **HNU-82**.

**Figure S3.** The PXRD pattern of **HNU-82-84**.

**Figure S4.** Fluorescence excitation and emission spectra of H<sub>3</sub>TCA.

**Figure S5.** Particle size distribution of **HNU-82**.

**Figure S6.** N<sub>2</sub> adsorption-desorption isotherms (a) and the pore size distribution (b) of **HNU-82**.

**Figure S7.** Anti-interference test of **HNU-82** against NZF and NFT antibiotic assays

**Figure S8.** PXRD spectra of **HNU-82** before and after detection of NZF and NFT.

**Figure S9.** Antibiotic chemical structural formula and molecular size.

**Table S2.** Comparison of Ln-MOF with H<sub>3</sub>TCA ligands.

**Table S3.** Comparison of white light emission MOF.

### Reference

## Materials and Physical Measurements

All reagents and solvents were purchased from commercial sources and used directly without further purification. Terbium(III) nitrate hexahydrate ( $\text{Tb}(\text{NO}_3)_3 \cdot 6\text{H}_2\text{O}$ ), Europium(III) nitrate hexahydrate ( $\text{Eu}(\text{NO}_3)_3 \cdot 6\text{H}_2\text{O}$ ) and Lanthanum(III) nitrate hexahydrate ( $\text{La}(\text{NO}_3)_3 \cdot 6\text{H}_2\text{O}$ ) were purchased from Shanghai Yien Chemical Technology Co., Ltd., 4,4',4''-nitrotribenzoic acid ( $\text{H}_3\text{TCA}$ ) was purchased from Yanshen Science and Technology Co., Ltd., Chinese Academy of Sciences of Jilin Province, Nitrofurazone (NZF), nitrofurantoin (NFT), azithromycin (AZM), clarithromycin (CLR), roxithromycin (ROX), sulfamonomethoxine (SMM) and ciprofloxacin hydrochloride (CPFX-HCl) were purchased from Shanghai Macklin Biochemical Co. Ltd.

Powder X-ray diffraction (PXRD) data was obtained by Rigaku Miniflex 600 X-Ray Diffractometer, with Cu Ka radiation at 40 kV and 15 mA at room temperature. Fourier transform infrared (FT-IR) spectra were recorded on Brooktensar-27 infrared spectrometer during the range of 4000 to 400  $\text{cm}^{-1}$ . Ultraviolet-visible absorption spectra (UV-vis) were measured with a Shimadzu UV-2700 spectrophotometer. Fluorescence spectra were achieved through a Shimadzu RF-6000 spectrophotometer. Thermogravimetric analyses (TGA) were taken on the Rigaku Thermal plus EVO2 TG-DTA 8122 instrument under oxygen stream with a heating rate of 10  $^{\circ}\text{C} \cdot \text{min}^{-1}$ .  $\text{N}_2$  adsorption/desorption isotherms were measured at 77 K using an ASAP2020M instrument. Elemental analyses (C, H, and N) were performed with a Vario EL cube elemental analyzer.

## X-ray Crystal Structure Analysis

X-ray single crystal diffraction data of **HNU-82-84** were measured and obtained on a Bruker APEX-II CCD with nitrogen-flow temperature controller using graphite monochromatic Mo K $\alpha$  radiation ( $\lambda=0.71073$  Å) at 150 K. The single crystal structure of **HNU-82-84** was reduced by the Bruker SHELXTL. The structure was solved by the direct method and refined by the full-matrix least-squares method on F<sup>2</sup> using the SHELXTL crystallographic software package.<sup>1</sup> All H atoms were placed geometrically for **HNU-82-84** and all nonhydrogen atoms were refined using anisotropic thermal parameters. The final formula of **HNU-82-84** was determined by single-crystal structure, and the crystallographic data was shown in Table S1 in the ESI. The CCDC numbers of **HNU-82-84** are 2225974, 2225976, 2225977.

**Table S1.** The crystal data of **HNU-82-84**.

| Complex                                               | <b>HNU-82</b>                                                     | <b>HNU-83</b>                                                     | <b>HNU-84</b>                                                     |
|-------------------------------------------------------|-------------------------------------------------------------------|-------------------------------------------------------------------|-------------------------------------------------------------------|
| Empirical formula                                     | C <sub>24</sub> H <sub>29</sub> N <sub>2</sub> O <sub>12</sub> Tb | C <sub>24</sub> H <sub>29</sub> N <sub>2</sub> O <sub>12</sub> Eu | C <sub>24</sub> H <sub>29</sub> N <sub>2</sub> O <sub>12</sub> La |
| Formula weight                                        | 696.41                                                            | 689.45                                                            | 676.4                                                             |
| Crystal system                                        | Monoclinic                                                        | Monoclinic                                                        | Monoclinic                                                        |
| Space group                                           | <i>P2<sub>1</sub>/n</i>                                           | <i>P2<sub>1</sub>/n</i>                                           | <i>P2<sub>1</sub>/n</i>                                           |
| <i>a</i> (Å)                                          | 9.2557                                                            | 9.2570                                                            | 9.3685                                                            |
| <i>b</i> (Å)                                          | 12.8698                                                           | 12.8401                                                           | 12.8587                                                           |
| <i>c</i> (Å)                                          | 23.7286                                                           | 23.8208                                                           | 24.1274                                                           |
| $\alpha$ (°)                                          | 90                                                                | 90                                                                | 90                                                                |
| $\beta$ (°)                                           | 94.905                                                            | 95.633                                                            | 96.179                                                            |
| $\gamma$ (°)                                          | 90                                                                | 90                                                                | 90                                                                |
| <i>V</i> (Å <sup>3</sup> )                            | 2816.2                                                            | 2817.69                                                           | 2889.66                                                           |
| <i>Z</i>                                              | 4                                                                 | 4                                                                 | 4                                                                 |
| <i>D</i> <sub>calcd</sub> (g cm <sup>-3</sup> )       | 1.643                                                             | 1.625                                                             | 1.555                                                             |
| $\mu$ (Mo K $\alpha$ ) (mm <sup>-1</sup> )            | 12.907                                                            | 16.492                                                            | 11.970                                                            |
| <i>F</i> (000)                                        | 1392                                                              | 1384                                                              | 1360                                                              |
| <i>R</i> <sub>int</sub>                               | 0.0649                                                            | 0.0632                                                            | 0.0390                                                            |
| <i>R</i> <sub>1</sub> <sup>a</sup> [I>2 $\delta$ (I)] | 0.0591                                                            | 0.0604                                                            | 0.0669                                                            |
| <i>wR</i> <sub>2</sub> <sup>b</sup> (all data)        | 0.1616                                                            | 0.1546                                                            | 0.1854                                                            |
| Goof on F <sup>2</sup>                                | 1.103                                                             | 1.080                                                             | 1.097                                                             |

$$R_1 = \sum(|F_o| - |F_c|) / \sum|F_o|; wR_2 = \{ \sum w(|F_o|^2 - |F_c|^2)^2 / \sum w(|F_o|^2)^2 \}^{1/2}.$$

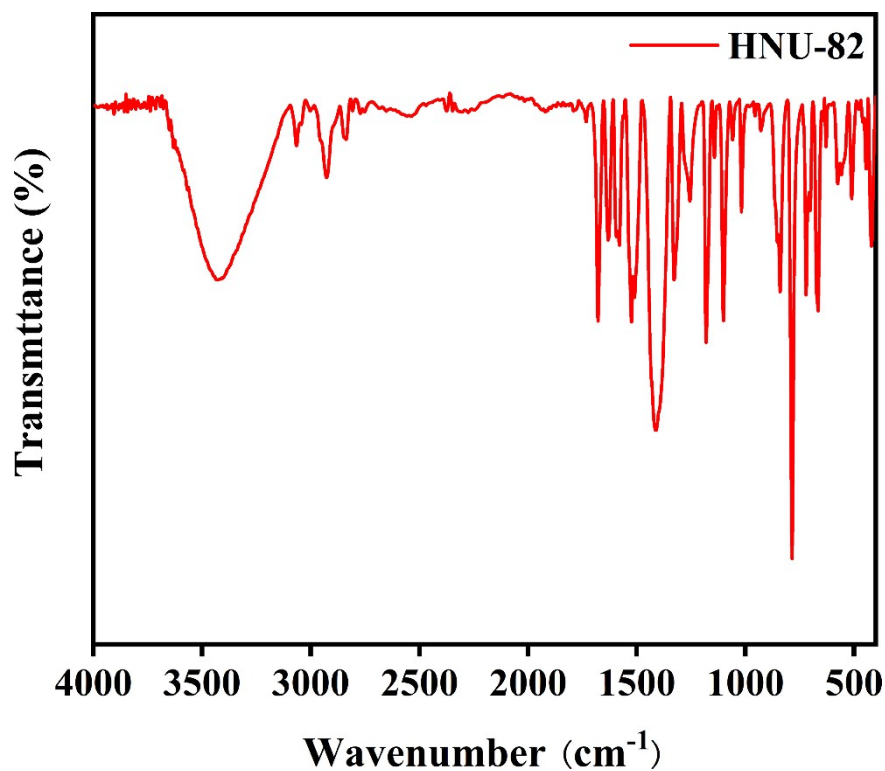

Figure S1. The IR spectrum of HNU-82.

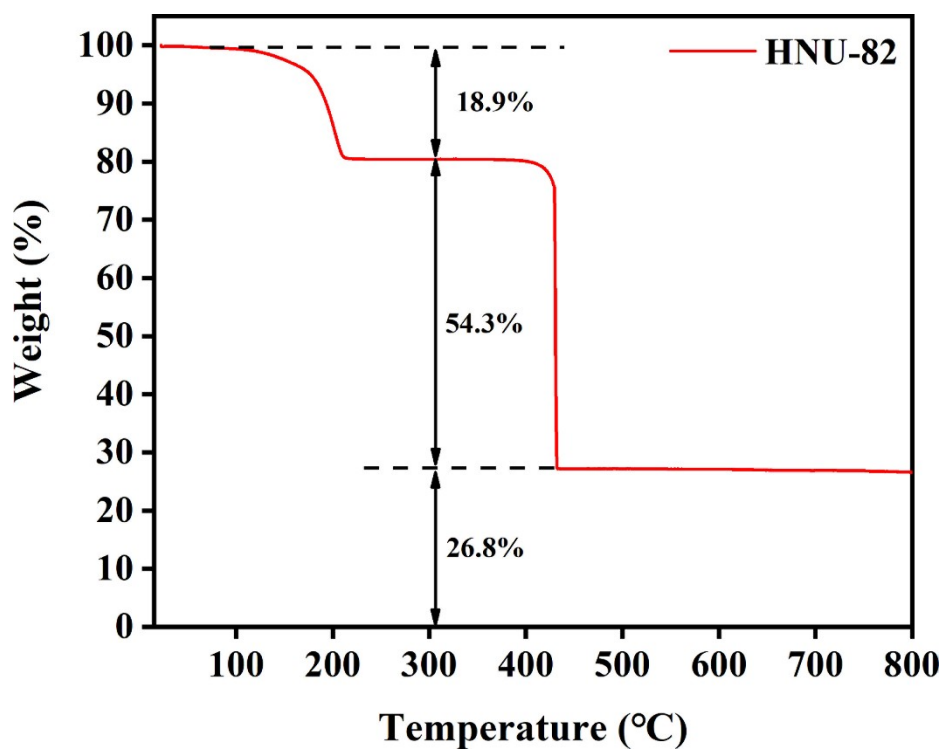

Figure S2. The TG plot of HNU-82.

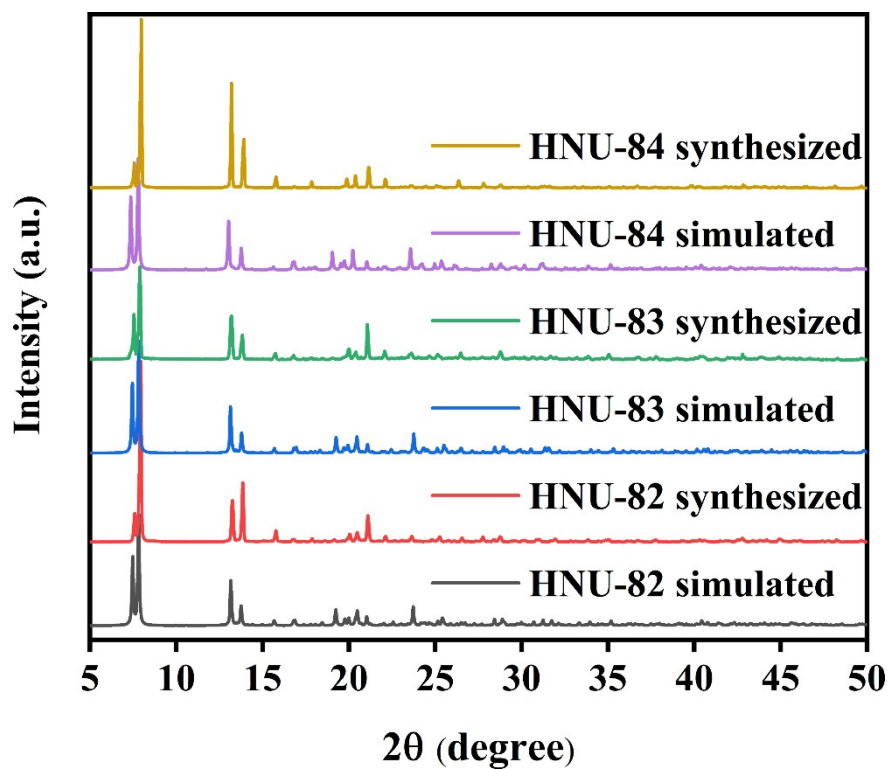

Figure S3. The PXRD pattern of HNU-82-84.

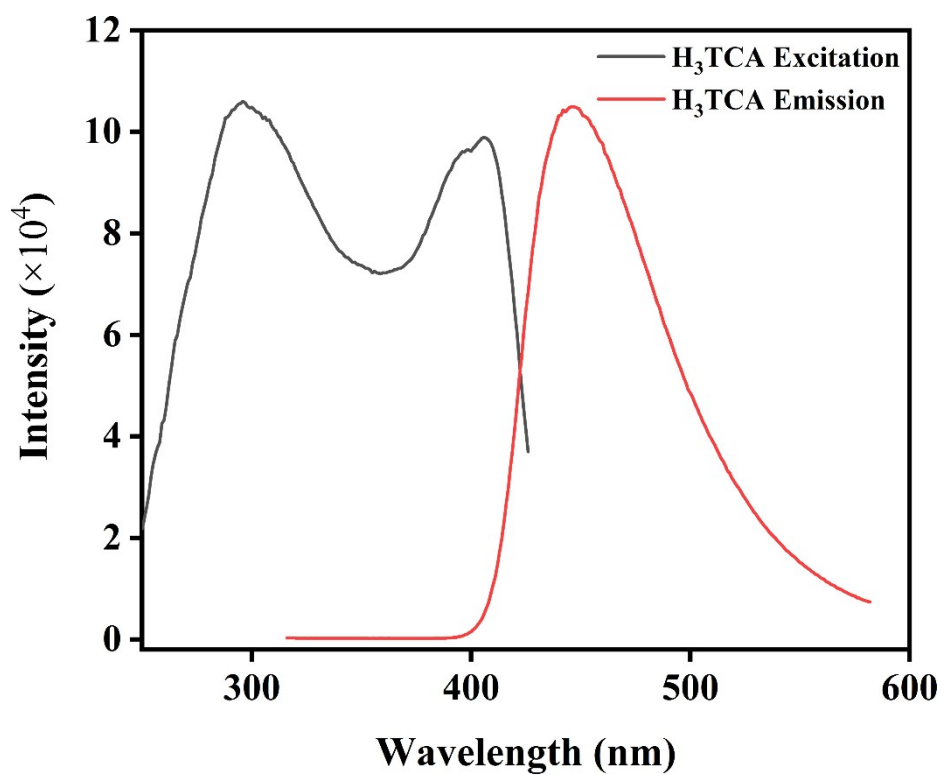

Figure S4. Fluorescence excitation and emission spectra of H<sub>3</sub>TCA.

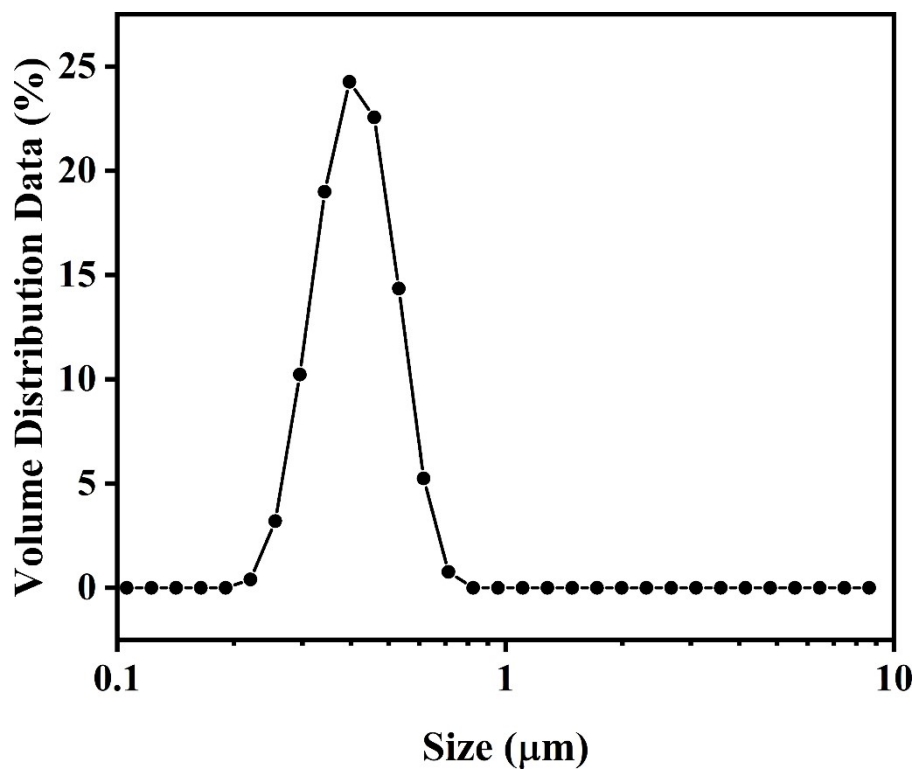

Figure S5. Particle size distribution of HNU-82.

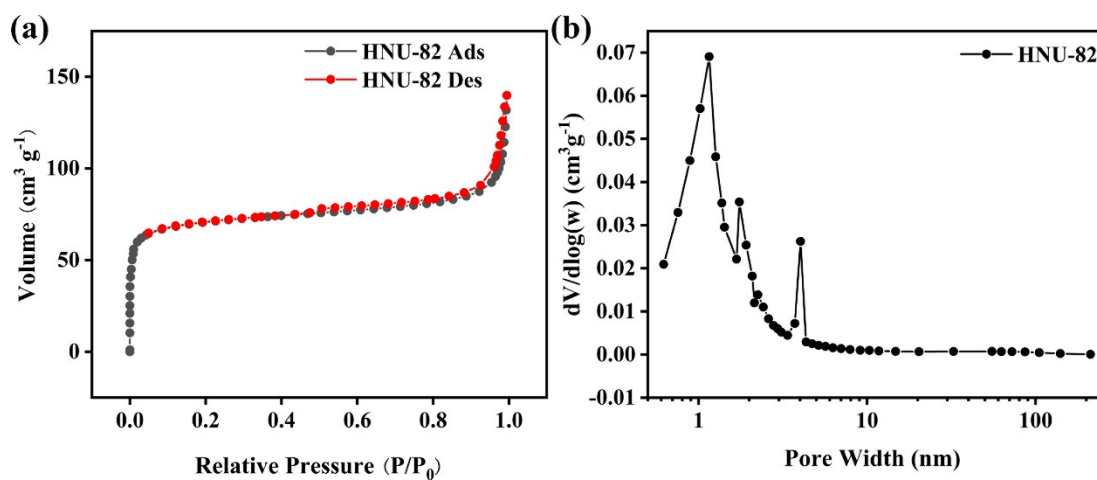

Figure S6. N<sub>2</sub> adsorption-desorption isotherms (a) and the pore size distribution (b) of HNU-82.

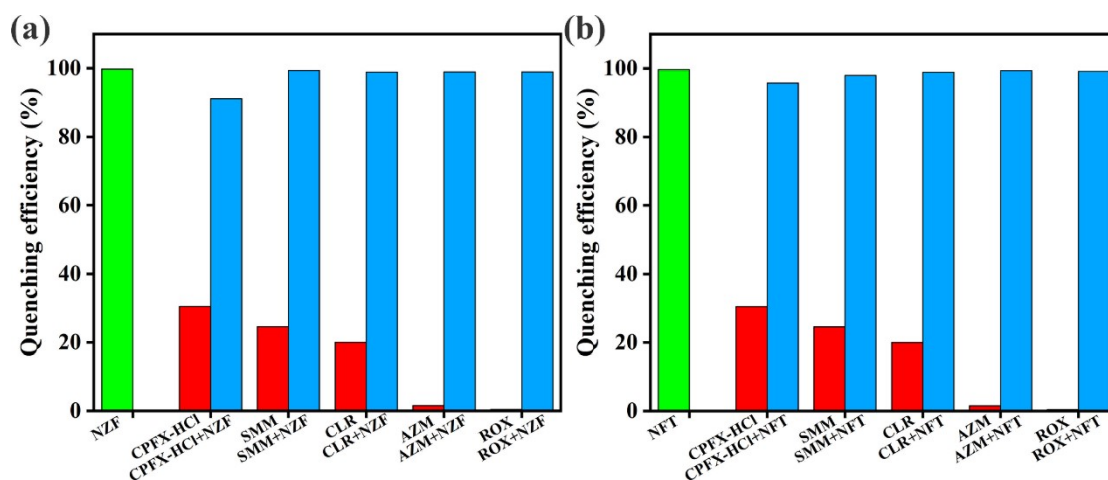

Figure S7. Anti-interference test of HNU-82 against NZF and NFT antibiotic assays.

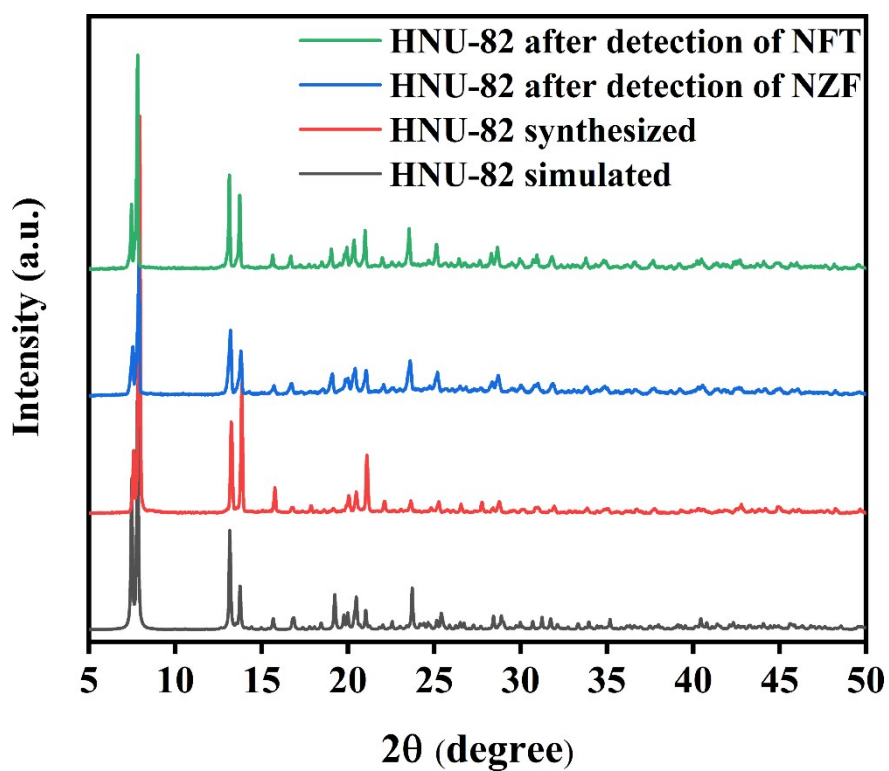

Figure S8. PXRD spectra of HNU-82 before and after detection of NZF and NFT.



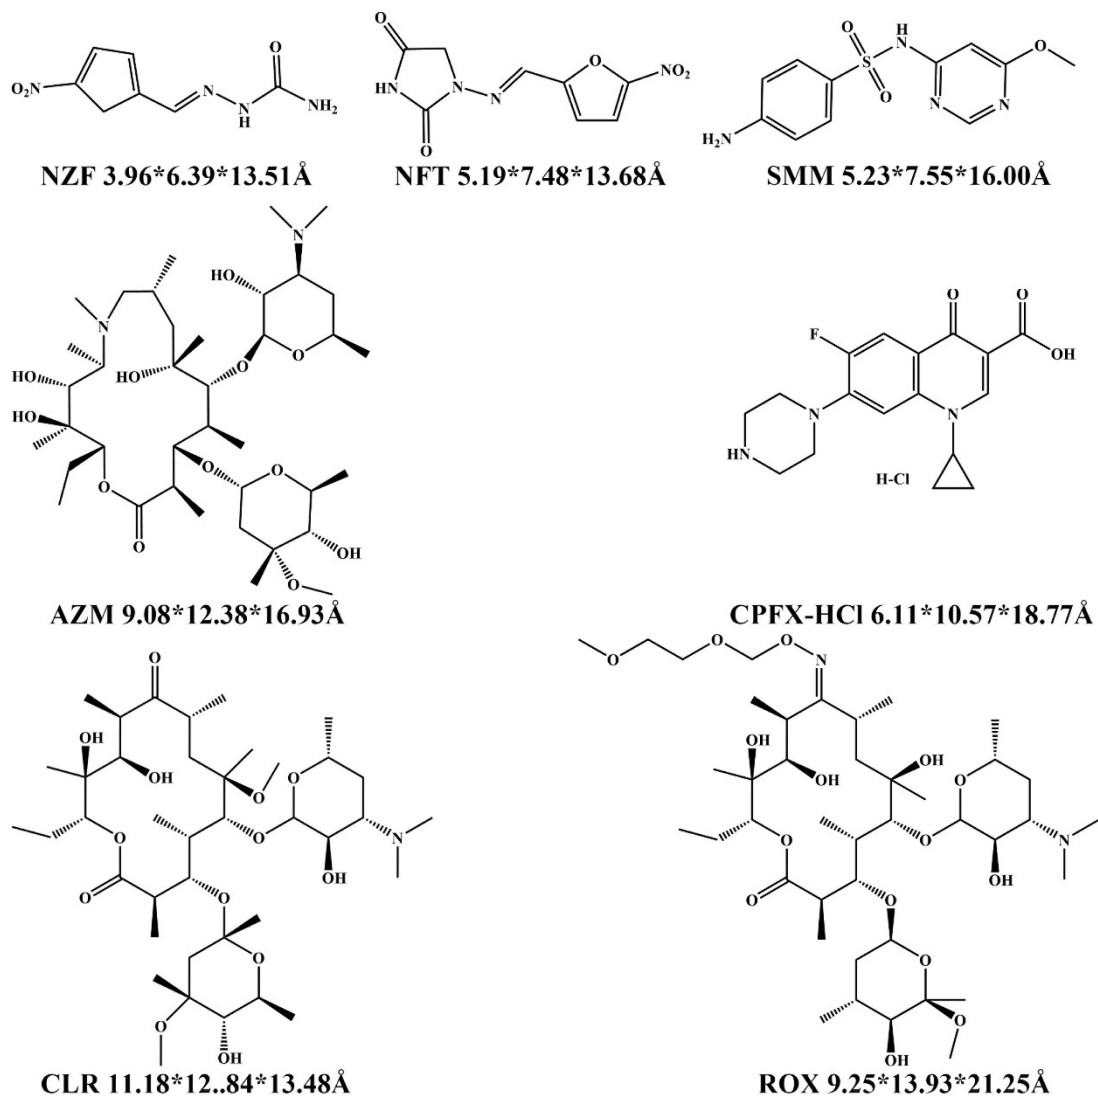

**Figure S9.** Antibiotic chemical structural formula and molecular size.

**Table S2. The space group and Ln-O connection mode of reported results and this work.**

| CCDC                    | Empirical Formula                                                                | Space group             | Ln-O                                     | reference s |
|-------------------------|----------------------------------------------------------------------------------|-------------------------|------------------------------------------|-------------|
| 2110293-5-6(La, Eu, Tb) | C <sub>25</sub> H <sub>21</sub> LnN <sub>2</sub> O <sub>7</sub>                  | <i>P-1</i>              | 7(6TCA <sup>3-</sup> ,1DMF)              | 3           |
| 841880(Eu)              | C <sub>63</sub> H <sub>42</sub> Eu <sub>3</sub> N <sub>3</sub> O <sub>21</sub> , | <i>P2<sub>1</sub>/c</i> | 9(6TCA <sup>3-</sup> ,1H <sub>2</sub> O) | 4           |
| 807487(Tb)              | C <sub>24</sub> H <sub>19</sub> N <sub>2</sub> O <sub>7</sub> Tb                 | <i>P-1</i>              | 8(6TCA <sup>3-</sup> ,1DMF)              | 5           |
| 1910649(Tb)             | C <sub>21</sub> H <sub>12</sub> NO <sub>6</sub> Tb                               | <i>C2/c</i>             | 8(6TCA <sup>3-</sup> )                   | 6           |
| 1052119(La)             | C <sub>21</sub> H <sub>14</sub> LaNO <sub>7</sub>                                | <i>R32</i>              | 9(6TCA <sup>3-</sup> ,1H <sub>2</sub> O) | 7           |
| 1444538 (La)            | C <sub>33</sub> H <sub>39</sub> LaN <sub>4</sub> O <sub>9</sub>                  | <i>Pbca</i>             | 9(3TCA <sup>3-</sup> ,3DMF)              | 8           |
| 2225974-6-7(Tb, Eu, La) | C <sub>24</sub> H <sub>29</sub> N <sub>2</sub> O <sub>12</sub> Tb                | <i>P2<sub>1</sub>/n</i> | 8(5TCA <sup>3-</sup> ,2H <sub>2</sub> O) | This work   |

**Table S3. The quantum yields of reported results and this work.**

| Material                                                          | $\lambda$ (nm) | CIE (x,y)      | QY (%) | CCT (K) | references |
|-------------------------------------------------------------------|----------------|----------------|--------|---------|------------|
| La <sub>0.9</sub> Tb <sub>0.093</sub> Eu <sub>0.007</sub> (cpioa) | 365            | (0.319, 0.331) | 54.74  | 6162    | 9          |
| Ln@bio-MOF-1                                                      | 365            | (0.328,0.338)  | 52.9   | 4725    | 10         |
| 1-Eu <sub>0.0855</sub> Gd <sub>0.6285</sub> Tb <sub>0.2860</sub>  | 390            | (0.34, 0.33)   | 22.4   | 5645    | 11         |
| Eu <sub>0.5</sub> Tb <sub>0.5</sub> -nanopaper@FB                 | 254            | (0.34, 0.36)   | 16.3   | 5336    | 12         |
| Eu <sub>0.045</sub> Tb <sub>0.955</sub> -CPOMBA                   | 365            | (0.326, 0.343) | 15     | 5733    | 13         |
| HMA-Tb <sub>10</sub> Eu <sub>1</sub>                              | 350            | (0.33, 0.34)   | 11.41  | -       | 14         |
| LnMOF-12                                                          | 345            | (0.332, 0.333) | 11.22  | -       | 15         |

|                                                                 |     |               |       |      |           |
|-----------------------------------------------------------------|-----|---------------|-------|------|-----------|
| Eu <sub>0.015</sub> Tb <sub>0.037</sub> La <sub>0.148</sub> TCA | 365 | (0.319,0.344) | 10.57 | 5645 | This work |
|-----------------------------------------------------------------|-----|---------------|-------|------|-----------|

## Reference

- 1 G. M. Sheldrick, *Acta crystallogr. C*, 2015, **71**, 3-8.
- 2 M. Mantina, A. C. Chamberlin, R. Valero, C. J. Cramer, D.G. Truhlar; *J. Phys. Chem. A*, 2009, **113**(19):5806-5812.
- 3 M. Tian, J. Zheng, J. Xue, X. Pan, D. Zhou, Q. Yao, Y. Li, W. Duan, J. Su, X. Huang, *Dalton Trans.*, 2021, **50** (47), 17785-17791.
- 4 P. Wu, J. W., C. He, X. Zhang, Y. Wang, T. Liu and C. Duan, *Adv. Funct. Mater.*, 2012, **22**, 1698-1703.
- 5 P. Wu, J. W., Y. Li, C. He, Z. Xie, and C. Duan, *Adv. Funct. Mater.*, 2011, **21**, 2788–2794.
- 6 M.-Y. Xu, Z.-Q. Wang, Y.-L. Wang, Q.-Y. Liu, *Chinese J. Struct. Chem.*, 2020, **39**, 126-131.
- 7 Q. Yao, A. B. Gomez, J. Su, V. Pascanu, Y. Yun, H. Zheng, H. Chen, L. Liu, H. N. Abdelhamid, B. Martín-Matute and X. Zou. *Chem. Mater.*, 2015, **27**, 5332-5339.
- 8 Pan, T., Wu, P., Zhang, W., Shen, Y., Huo, F. *Chem. Commun.*, 2022, **58** (56), 7809-7812.
- 9 Z. Yu, S. Kang, M. Tai, J. Wang, Q. Tian, D. Jin and L. Wang, *Dyes Pigm.*, 2023, **209**, 110897.
- 10 J. Wang, M. Tai, Z. Yu, S. Kang, D. Jin, L. Wang, *Dalton Trans.*, 2023, **52** (5), 1212-1218.
- 11 X.-Y. Li, W.-J. Shi, X.-Q. Wang, L.-N. Ma, L. Hou and Y.-Y. Wang. *Cryst. Growth Des.*, 2017, **17**, 4217-4224.
- 12 Z. Zhang, N. Ma, S. Yao, W. Han, X. Li, H. Chang and Y.-Y. Wang, *ACS Sustainable Chem. Eng.*, 2021, **9**, 5827-5837.
- 13 Y. W. Zhao, F. Q. Zhang and X. M. Zhang, *ACS Appl. Mater. Interfaces*, 2016, **8**, 24123-24130.
- 14 H. Liu, T. C., Z. Rao, S. Wang, Y. Yang and W.-T. Wong. *Adv. Optical Mater.*, 2015, **3**, 1545-1550.
- 15 Y.-Y. An, L.-P. L., Si-Si Feng and M.-L. Zhu. *J. Name.*, 2013, **00**, 1-3.
